# Supplementary material for: Engineered human platelet-derived microparticles as natural vectors for targeted drug delivery
Source: PubMed Central journal article supplement (PMC6791386; doi:10.18632/oncotarget.27223), 2019-10-08
Supplement: oncotarget-10-5835-s001.pdf [file oncotarget-10-5835-s001.pdf]

## Engineered human platelet-derived microparticles as natural vectors for targeted drug delivery

### SUPPLEMENTARY MATERIALS

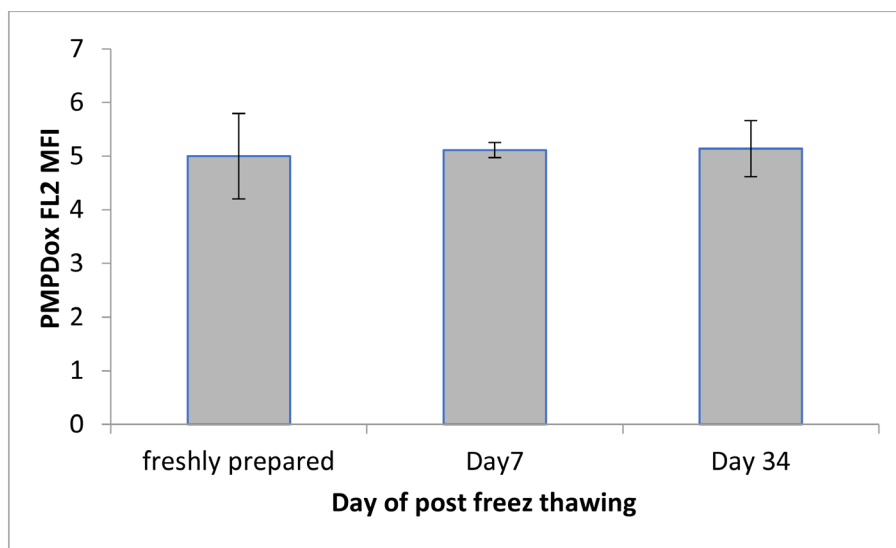

Supplementary Figure 1: Dox fluorescence is well retained in PMPDox samples after storing at  $-80^{\circ}\text{C}$  and thawing. Graph shows mean and SD from results of 3 experiments.

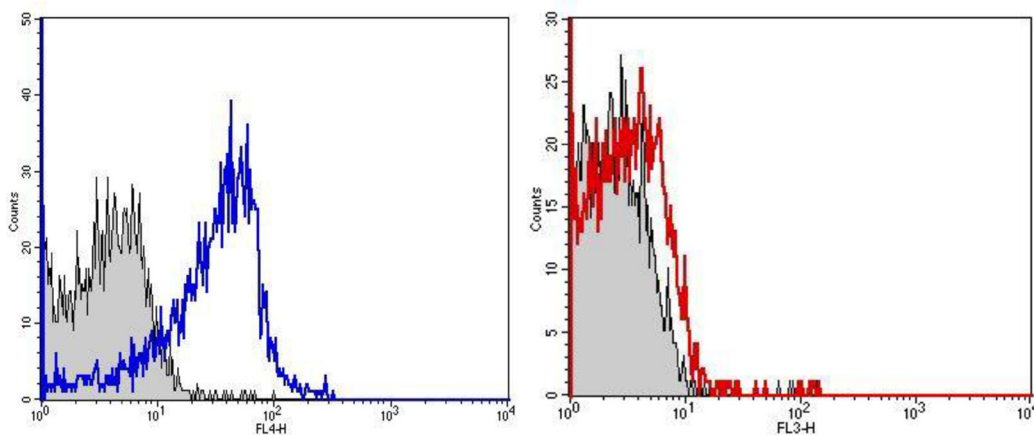

Supplementary Figure 2: Histograms exhibiting successful loading of methylene blue (left panel, blue trace) and ALA (right panel, red trace) in PMPs. Control PMPs (vehicle-treated), shaded trace. Graphs are representative of 3 independent experiments.

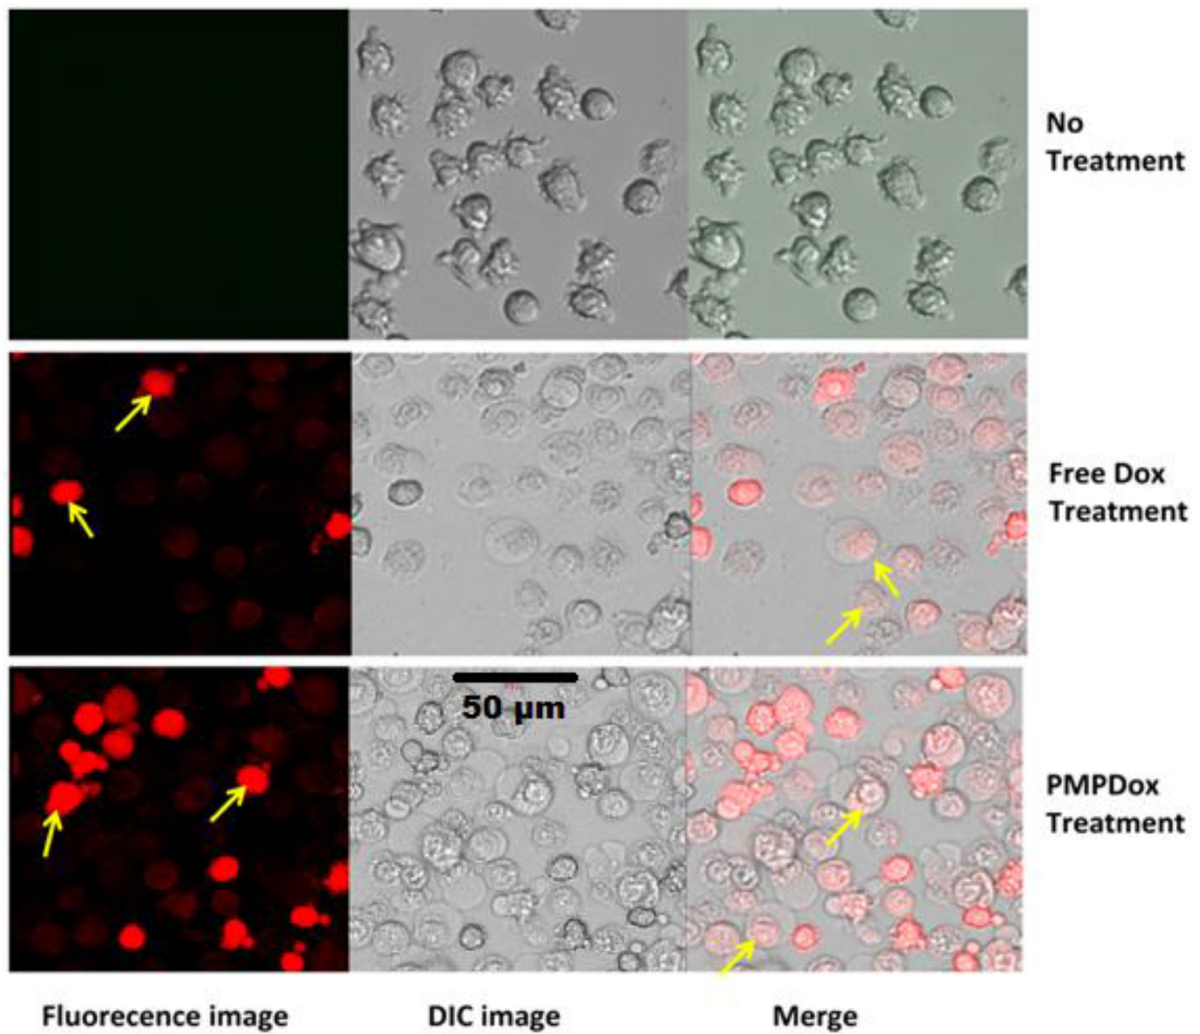

**Supplementary Figure 3: Fluorescence microscopy of HL 60 cells without treatment, treatment with free Dox and PMPDox. Nuclei stained with Dox are indicated with arrowheads. Images are representative of 3 independent experiments.**

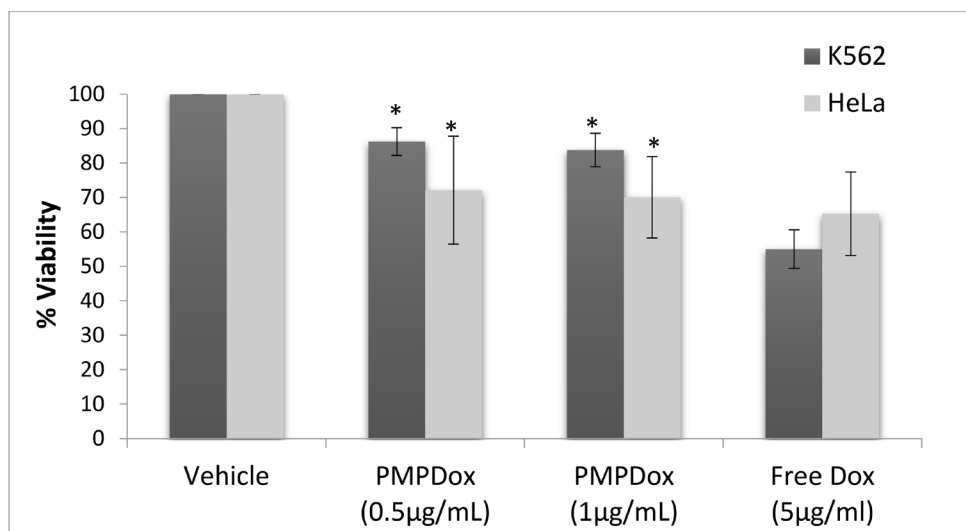

**Supplementary Figure 4: PMPDox toxicity in K562 and HeLa cells after 48 h incubation studied by MTT assay. Results represent mean  $\pm$  SD of 4 sets of experiments. \* $P < 0.05$  against vehicle.**

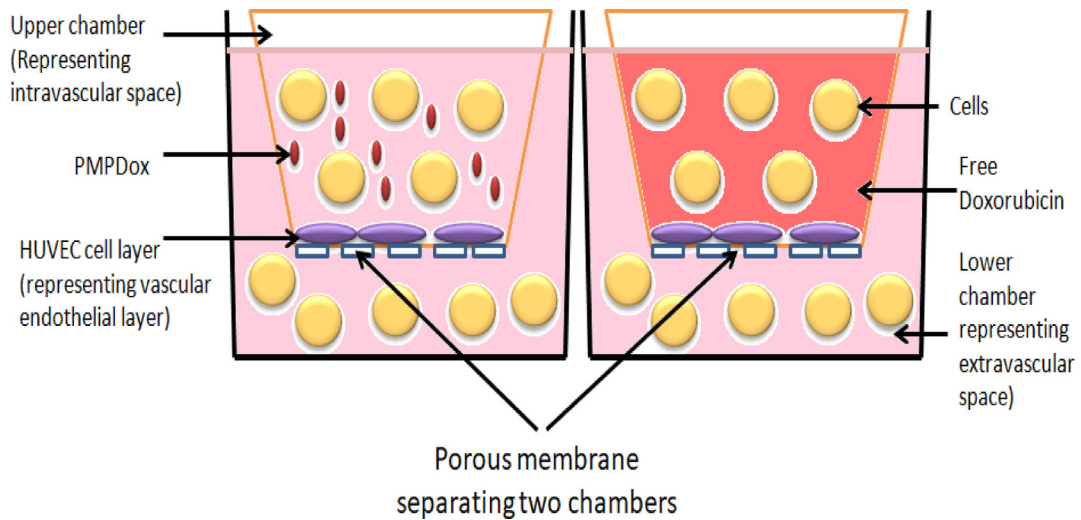

**Supplementary Figure 5: Transwell experiment mimicking vascular system.** Upper and lower wells were separated by porous membrane lined with HUVEC cells, representing vascular endothelial layer. Upper well represents intravascular while lower well represents extravascular compartments.

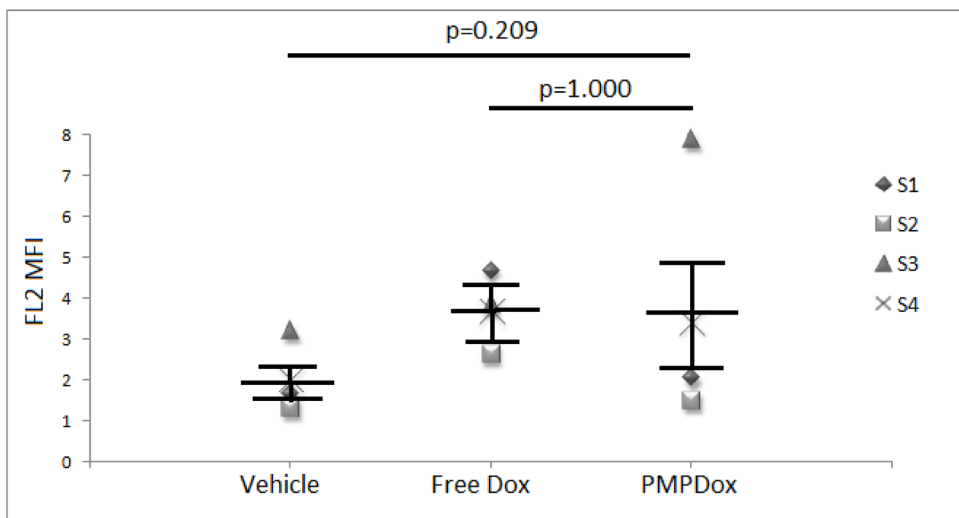

**Supplementary Figure 6: Uptake of Dox by normal leukocytes in whole blood samples obtained from 4 healthy donors (S1 to S4), showing uptake of Dox through PMPDOx as well as free Dox.** There was no statistically significant difference between both methods (paired *t*-test). Bars show mean and standard error of mean.
